# Supplementary material
Source: PubMed Central journal article supplement (PMC4238258)
Supplement: Supp_Figure1.pdf [file Supp_Figure1.pdf]

## Supplementary Data

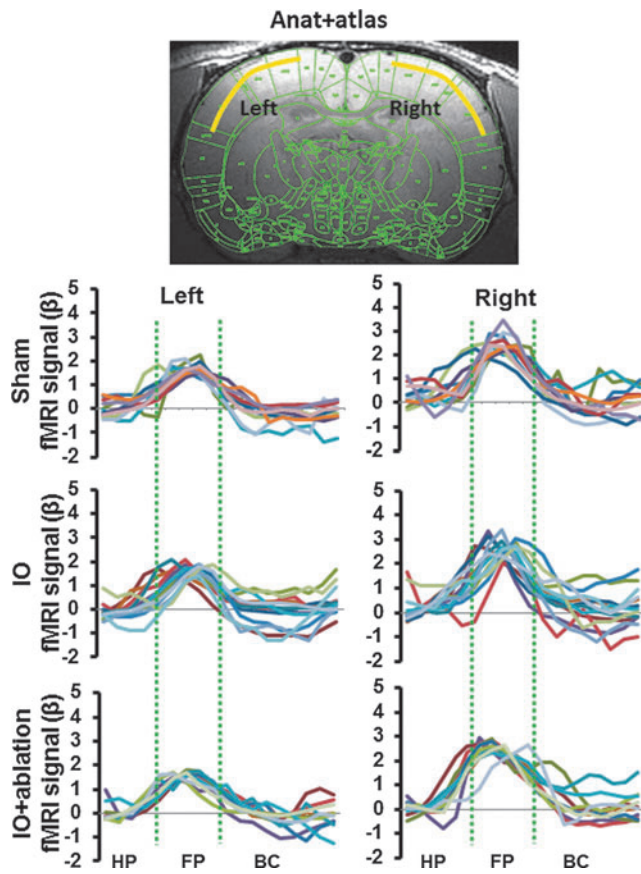

**SUPPLEMENTARY FIG. S1.** The spatial fMRI line profile across the deep layer of the rat S1. The upper panel is the T1-weighted MRI images, which are registered to the functional EPI images in Figure 1. Yellow lines were drawn to cover the HP-S1, FP-S1, and BC based on the registered brain atlas. The normalized fMRI signal along the yellow line was plotted in both hemispheres from all individual rats. The dotted lines delineate the partitions of different cortices based on the brain atlas.
